# Supplementary material for: Enhanced Antibacterial Activity of CuS-BSA/Lysozyme under Near Infrared Light Irradiation
Source: MDPI journal article supplement (doi:10.3390/nano11092156), 2021-08-24
Supplement: s1 [file s1]

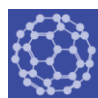

# Enhanced Antibacterial Activity of CuS-BSA/Lysozyme under Near Infrared Light Irradiation

Abir Swaidan <sup>1,2</sup>, Sena Ghayyem <sup>1,3</sup>, Alexandre Barras <sup>1</sup>, Ahmed Addad <sup>4</sup>, Mohammed A. Amin <sup>5</sup>, Sabine Szunerits <sup>1</sup>, and Rabah Boukherroub <sup>1,\*</sup>

<sup>1</sup> Univ. Lille, CNRS, Centrale Lille, Univ. Polytechnique Hauts-de-France, UMR 8520-IEMN, F-59000 Lille, France; abir.swaidan.90@gmail.com (A.S.); sghsgh.1368@gmail.com (S.G.); alexandre.barras@univ-lille.fr (A.B.); sabine.szunerits@univ-lille.fr (S.S.)

<sup>2</sup> LEADDER, Laboratoire des études appliquées au développement durable et énergie renouvelable, Univ. Libanaise, 1417614411 Hadath, Lebanon

<sup>3</sup> Analytical Chemistry Department, School of Chemistry, College of Science, Univ. of Tehran, Tehran, Iran

<sup>4</sup> CNRS, UMR 8207—UMET, Univ. Lille, F-59000 Lille, France; ahmed.addad@univ-lille.fr

<sup>5</sup> Department of Chemistry, College of Science, Taif Univ., P.O. Box 11099, Taif 21944, Saudi Arabia; mohamed@tu.edu.sa

\* Correspondence: rabah.boukherroub@univ-lille.fr; Tel.: +333-62-53-17-24

## Materials and Methods

Lysozyme from chicken egg white (protein  $\geq 90\%$ ,  $\geq 40,000$  units/mg protein), bovine serum albumin (BSA,  $\geq 96\%$ ), copper(II) acetate [ $\text{Cu}(\text{Ac})_2$ , 98.0%], sodium sulfide hydrate ( $\text{Na}_2\text{S}\cdot x\text{H}_2\text{O}$ ,  $\geq 97.0\%$ ), sodium hydroxide pellets ( $\text{NaOH}$ ,  $\geq 97.0\%$ ), Mueller Hinton Agar, Muller Hinton Broth, 1,3-diphenyl isobenzofuran (DPBF, 97%) and glutaraldehyde solution (Grade II, 25% in water) were purchased from Sigma-Aldrich. LB (Luria-Bertani) Broth Miller and LB Agar Miller were purchased from Fisher Bioreagents. Propidium iodide (PI, 668.4 g/mole) and SYTO 9 nucleic acid stain (3.34 mM) (BacLight stains), sterile PBS (1X, pH 7.4) and ethanol (95% v/v) were obtained from Fisher Scientific.

Sterile Milli-Q (MQ) water was used throughout the whole procedure.

## Characterization

The UV-vis absorbance spectra of the synthesized nanoparticles (NPs) were recorded in the 200–800 nm wavelength range using a Perkin Elmer Lambda UV/vis 950 spectrophotometer with an optical path of 10 mm in a 1 cm quartz cuvette.

Hydrodynamic size and surface charge of the CuS-BSA and CuS-BSA/Lysozyme NPs were determined using dynamic light scattering (Malvern Zetasizer, NanoZS) at 25 °C. Solutions were freshly prepared before analysis, and the reported data are means for three independent measurements.

Morphology and particle size of CuS-BSA NPs were investigated by transmission electron microscopy (TEM) and high resolution TEM (HRTEM) using a FEI TECNAI G2-20 operated at an accelerating voltage of 200 kV with a resolution of 1.9 Å and equipped with EDS detector. Analysis was carried out by depositing  $\sim 10$   $\mu\text{L}$  of CuS-BSA aqueous solution (0.1 mg/mL) on a carbon 200 mesh grid and left to dry at room temperature.

Raman spectroscopy measurements were carried out by depositing 30  $\mu\text{L}$  of an aqueous CuS-BSA NPs (0.1 mg/mL) on a crystalline silicon wafer and dried at room temperature; the silicon wafer was previously cleaned by ultrasonication in acetone, ethanol, and water for 10 min each. Analysis was performed on a LabRam HR Micro-Raman system (Horiba Jobin Yvon) using a 473-nm laser diode as an excitation source. Visible light is focused by a 100 $\times$  objective. The scattered light was collected by the same objective in backscattering configuration, dispersed by a 300 mm focal length monochromator and detected by a CCD camera.

The crystallinity of the synthesized nanoparticles was assessed on a Xeuss 2.0 SAXS/WAXS system (Xenocs) operating under vacuum with a GeniX3D microsource ( $\lambda = 1.54189 \text{ \AA}$ ) at a generator voltage of 50 kV and a current of 0.6 mA with a 2D Pilatus 3R 200K detector.

X-ray photoelectron spectroscopy (XPS) experiments were performed on a PHI 5000 VersaProbe-Scanning ESCA Microprobe (ULVAC-PHI, Japan/USA) instrument at a base pressure below  $5 \times 10^{-9}$  mbar. Monochromatic  $\text{AlK}_{\alpha}$  radiation was used and the X-ray beam, focused to a diameter of 100  $\mu\text{m}$ , was scanned on a  $250 \times 250 \mu\text{m}$  surface, at an operating power of 25 W (15 kV). Photoelectron survey spectra were acquired using a hemispherical analyzer at a pass energy of 117.4 eV with a 0.4 eV energy step. Core-level spectra were recorded at a pass energy of 23.5 eV with a 0.1 eV energy step. All spectra were obtained with  $90^\circ$  between X-ray source and analyzer and with the use of low energy electrons and low energy argon ions for charge neutralization. After subtraction of the linear-type background, the core-level spectra were decomposed into their components with mixed Gaussian-Lorentzian (30:70) shape lines using the CasaXPS software. Quantification calculations were performed using sensitivity factors supplied by PHI.

Fourier-transform infrared spectroscopy (FTIR) was conducted on a Thermo Fisher Inc, Nicolet 8700. The nanoparticles were analyzed in the IR radiation in a pellet form, obtained by mixing 1.5 mg of lyophilized lysozyme, CuS-BSA or CuS-BSA/Lysozyme with 200 mg of potassium bromide (KBr) and grinding to enhance uniform distribution in the KBr base. The mixtures were then pressed in a hydraulic press at a pressure  $\sim 9$  tons and analyzed in the FTIR range  $650\text{--}4000 \text{ cm}^{-1}$ .

**Bacteria visualization.** The slides were directly visualized using a Cytation™ 5 Cell Imaging Multi-Mode Reader (BioTek Instruments SAS, France) at  $20\times$  magnification with an Olympus Plan Fluorite WD 6.6 NA 0.45 objective and the corresponding excitation and emission filters (469-35/525-39 nm for GFP and 586-15/647-57 for Texas Red).

**Bacteria imaging.** Scanning electron microscopy (SEM) images were obtained using a Zeiss Compact Merlin instrument at 1 kV under high vacuum with a secondary electron detector. The biological samples were previously fixed with 1% glutaraldehyde solution for 30 min in the dark at room temperature, mounted on stubs and sputter-coated with a 5-nm platinum layer.

All experiments were conducted with at least duplicate or triplicate observations per condition. Data were analyzed by two-way analysis of variance (ANOVA) with Dunnett's multiple comparisons test (comparison of multiple groups) and expressed as mean  $\pm$  SD. \* $p$  value  $< 0.05$ , \*\* $p$  value  $< 0.01$ , \*\*\* $p$  value  $< 0.001$ , and \*\*\*\* $p$  value  $< 0.0001$  were considered significant compared to a control. Statistical analysis was performed with GraphPad Prism 7 (version 7.05).

### Evaluation of the mechanism of apoptosis – necrosis

HeLA cells were seeded into 24-well plates at a density of  $5 \times 10^4$  cells per well in 500  $\mu\text{L}$  culture medium. After 24 h, the culture medium was replaced with 1 mL of various concentrations ( $100\text{--}200 \mu\text{g mL}^{-1}$ ) of CuS-BSA/Lysozyme or control medium 4 h before irradiation. After incubation, cells were irradiated with 980 nm ( $1.0 \text{ W cm}^{-2}$ ) continuous mode laser for 3 min and incubated for another 20 h. Then the liquid was removed, and the cell death mechanisms was carried out using the Annexin-V and PI stainings. Briefly, the cells were directly stained with Hoechst/Annexin V-FITC/Propidium Iodide (PI) solutions. Hoechst ( $5 \mu\text{g mL}^{-1}$ ), 1X Annexin V-FITC (Novex™ Kit, ApoDETECT™, X20 solution) and propidium iodide ( $1.5 \mu\text{g mL}^{-1}$ ) were diluted with 1X binding buffer (10 mM HEPES/NaOH, pH 7.4, 140 mM NaCl, 2.5 mM  $\text{CaCl}_2$ ) and the cells were incubated with 500  $\mu\text{L}$  of the staining solution at room temperature for 15 min in the dark. The cells were directly visualized in 1X binding buffer using a Cytation™ 5 Cell Imaging Multi-Mode Reader (BioTek Instruments SAS, France) at  $4\times$  magnification with an Olympus Plan Fluorite WD 17 NA 0.13 objective and the corresponding excitation and emission filters (377-50/447-60 nm for Hoechst, 469-35/525-39 nm for Annexin V-FITC and 586-15/647-57

nm for propidium iodide). The addition of PI enabled viable ( $\text{AnnV}^{\text{neg}}/\text{PI}^{\text{neg}}$ ), early apoptotic ( $\text{AnnV}^{\text{pos}}/\text{PI}^{\text{neg}}$ ), late apoptotic ( $\text{AnnV}^{\text{pos}}/\text{PI}^{\text{pos}}$ ) and necrotic ( $\text{AnnV}^{\text{neg}}/\text{PI}^{\text{pos}}$ ) cells to be distinguished. Cell counting was used to quantify the number of viable, early apoptotic, late apoptotic and necrotic cells.

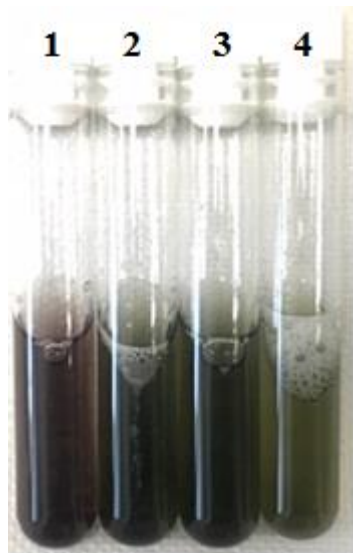

**Figure S1.** The long-term stability of CuS-BSA NPs at a concentration of  $1 \text{ mg mL}^{-1}$  in (1) DMEM medium, (2) DMSO, (3) PBS (1X, pH 7.4), and (4) bacterial MHB nutrient medium.

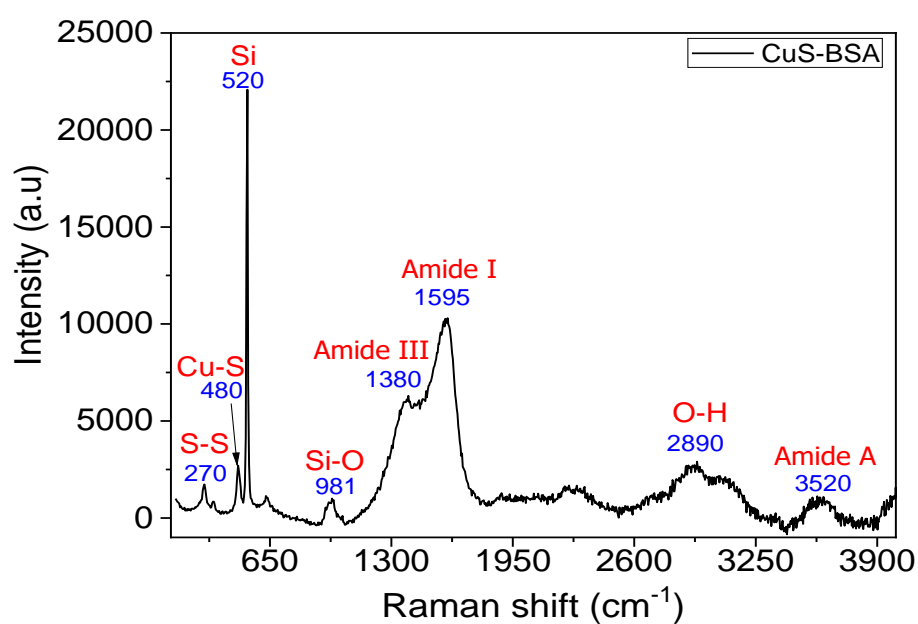

**Figure S2.** Raman spectrum of CuS-BSA NPs. The sharp peak at  $520 \text{ cm}^{-1}$  is due to crystalline silicon on which the CuS-BSA nanoparticles were deposited.

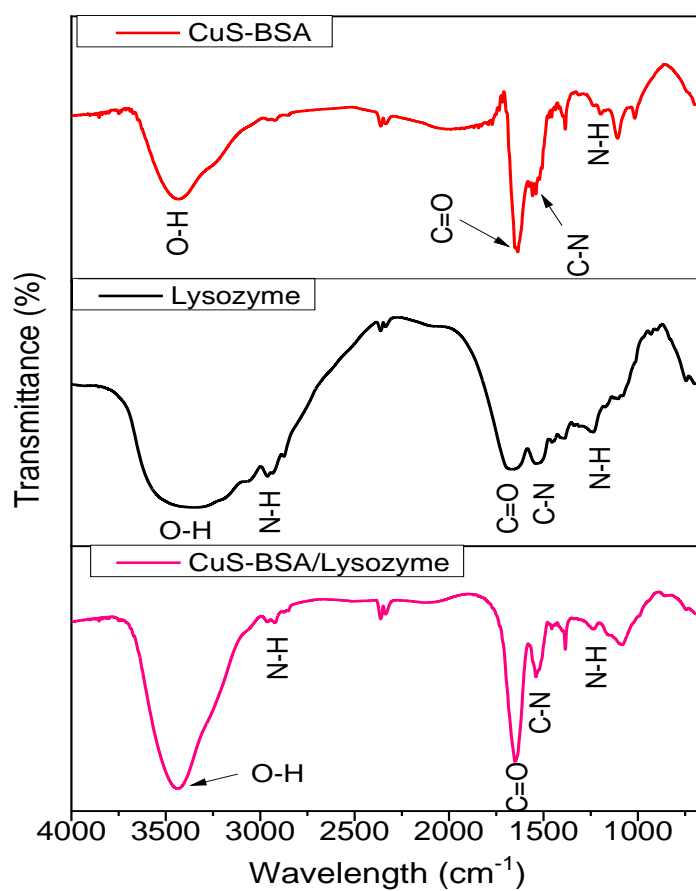

Figure S3: FTIR spectra of CuS-BSA, lysozyme and CuS-BSA/Lysozyme.

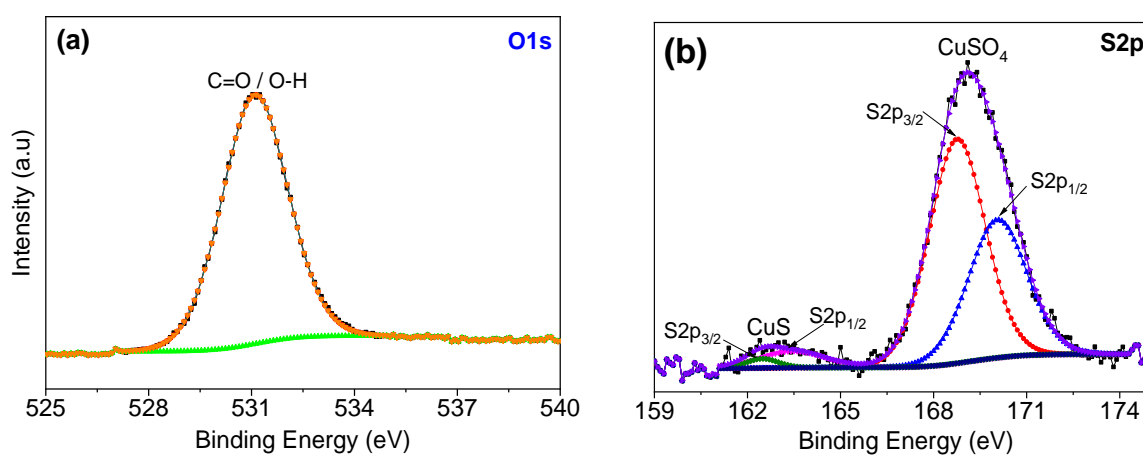

Figure S4. High-resolution XPS spectra of the O<sub>1s</sub> (a) and S<sub>2p</sub> (b) of CuS-BSA NPs.

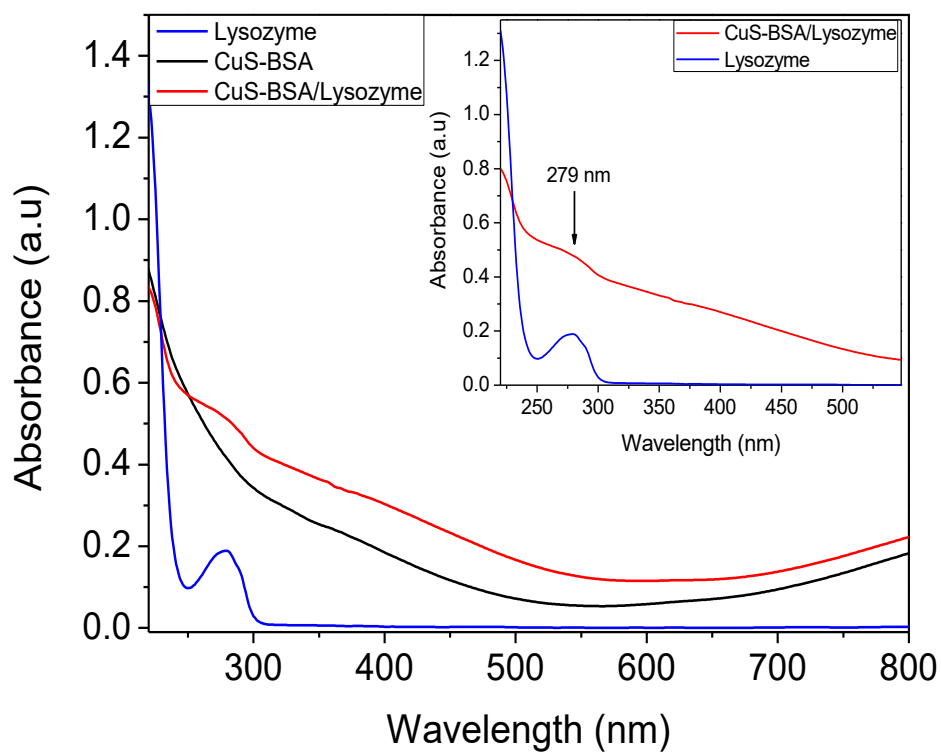

Figure S5. UV-vis absorption spectra of lysozyme (blue), CuS-BSA (black), and CuS-BSA/Lysozyme (red).

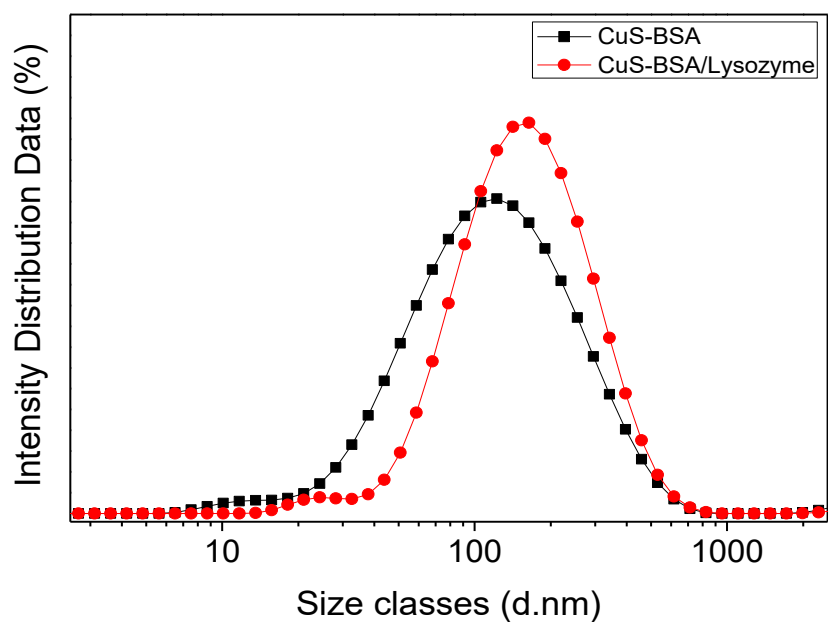

Figure S6. Dynamic light scattering (DLS) curves of CuS-BSA and CuS-BSA/Lysozyme.

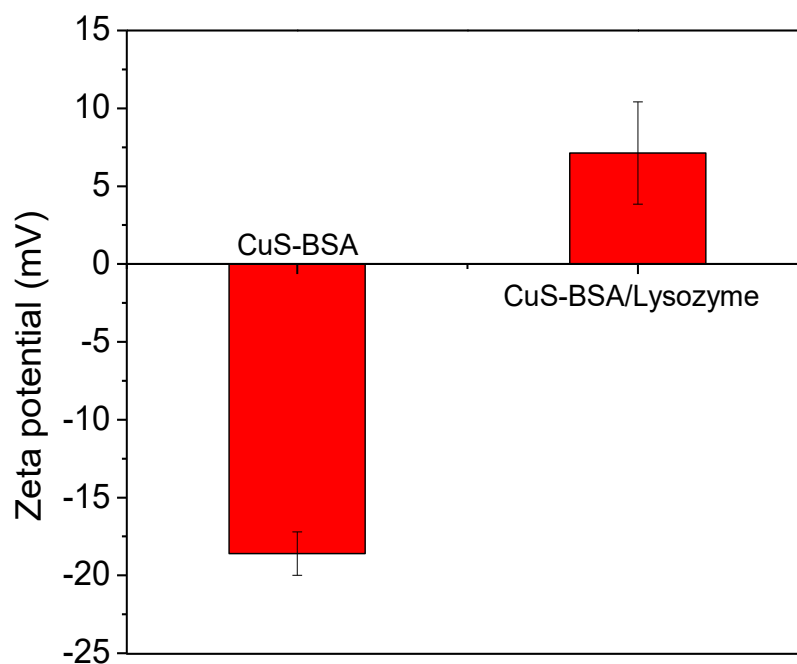

**Figure S7.** Comparison of zeta potential of CuS-BSA and CuS-BSA/Lysozyme in MQ-water.

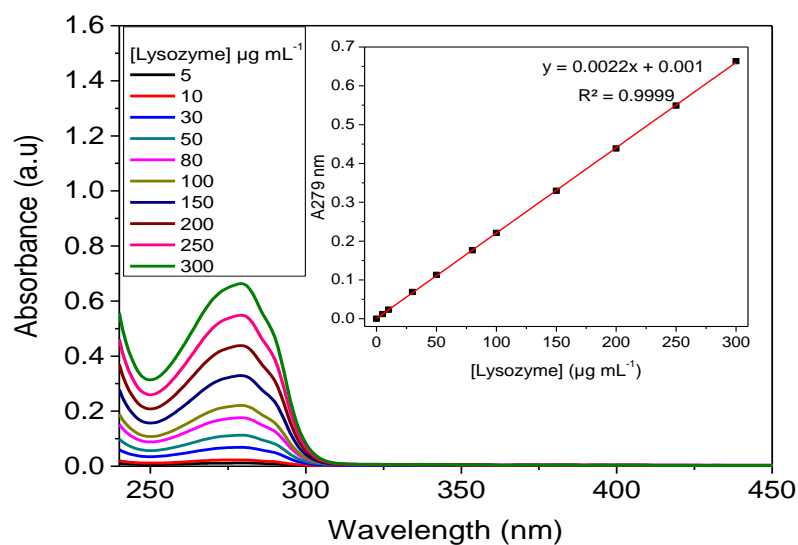

**Figure S8.** UV-vis absorption spectra of lysozyme in PBS (0.01 mol L<sup>-1</sup>, pH 7.4) at various concentrations. Inset: The corresponding calibration curve.

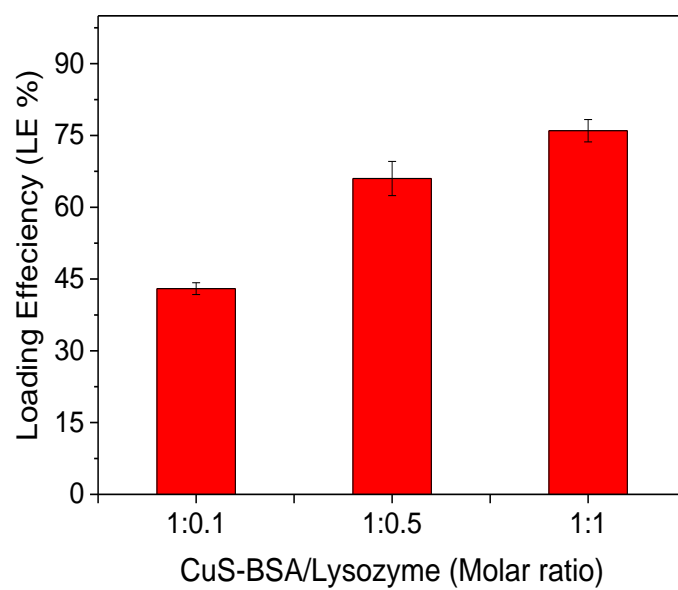

**Figure S9.** Lysozyme loading efficiency (LE %) by CuS-BSA in PBS (0.01 mol L<sup>-1</sup>, pH 7.4).

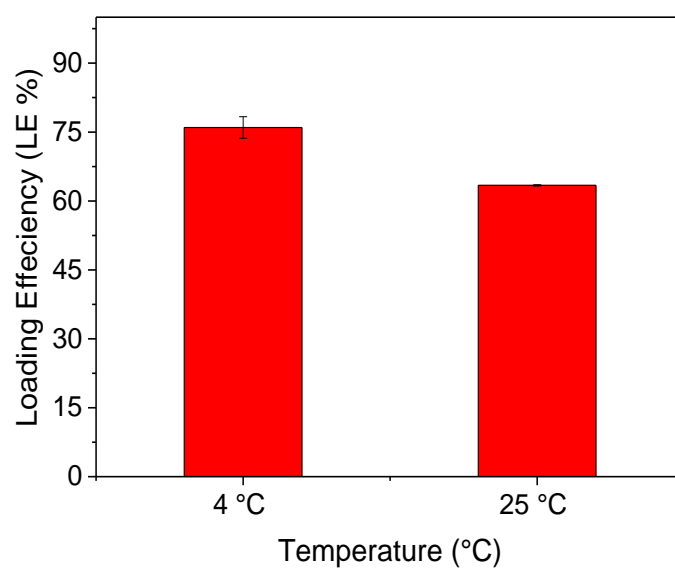

**Figure S10.** Lysozyme loading efficiency (LE %) onto CuS-BSA in PBS (0.01 mol L<sup>-1</sup>, pH 7.4) at 4°C and 25°C.

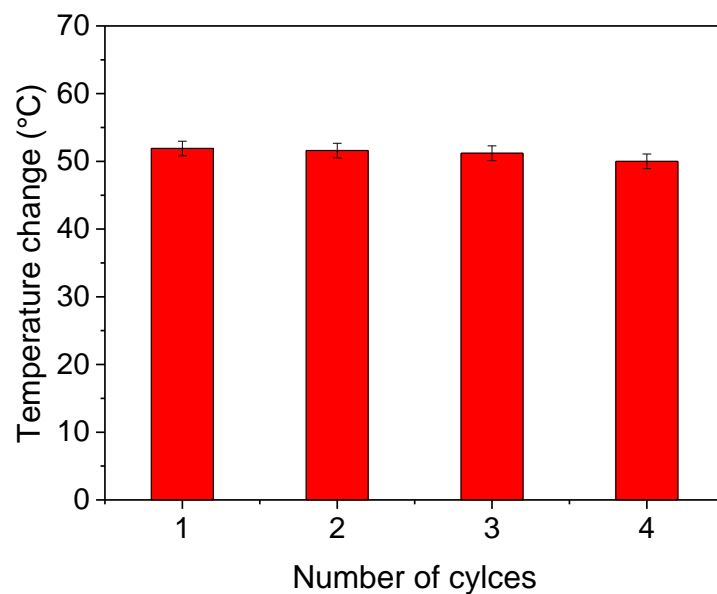

**Figure S11.** Temperature elevation of CuS-BSA ( $100 \mu\text{g mL}^{-1}$ ) over four laser on/off cycles under 980-NIR laser irradiation for 3 min using a power density  $0.7 \text{ W cm}^{-2}$ .

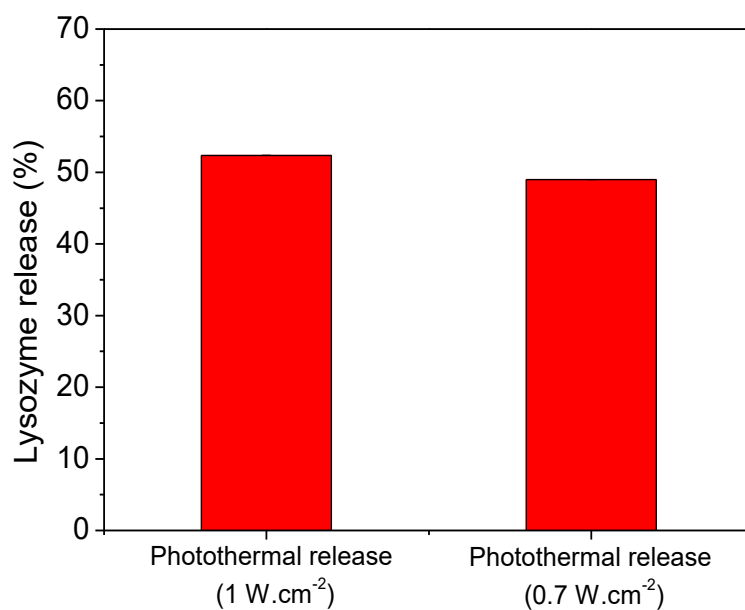

**Figure S12.** Photothermal release of lysozyme (%) from CuS-BSA NPs ( $0.1 \text{ mg mL}^{-1}$ ) after 3 min laser irradiation at 980 nm. Experiments were done in triplicate.



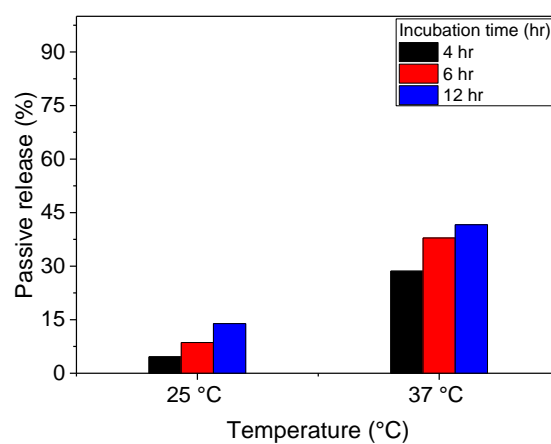

**Figure S13.** Passive release of lysozyme (%) from CuS-BSA NPs (0.1 mg mL<sup>-1</sup>) at various temperatures and incubation times.

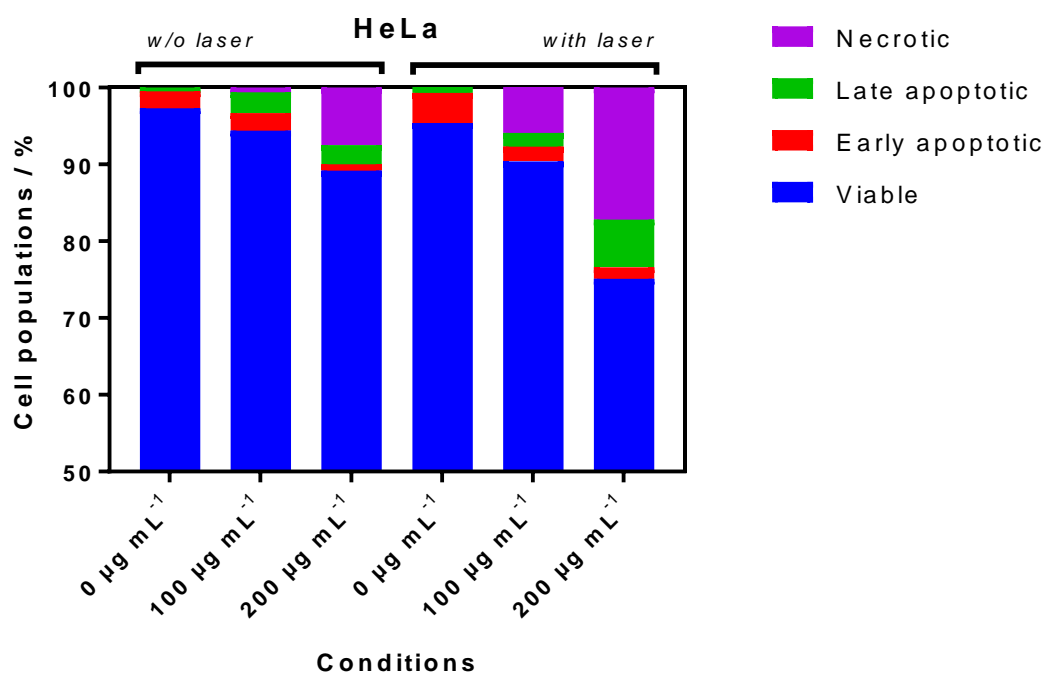

**Figure S14.** HeLa cell death mechanism under different conditions.

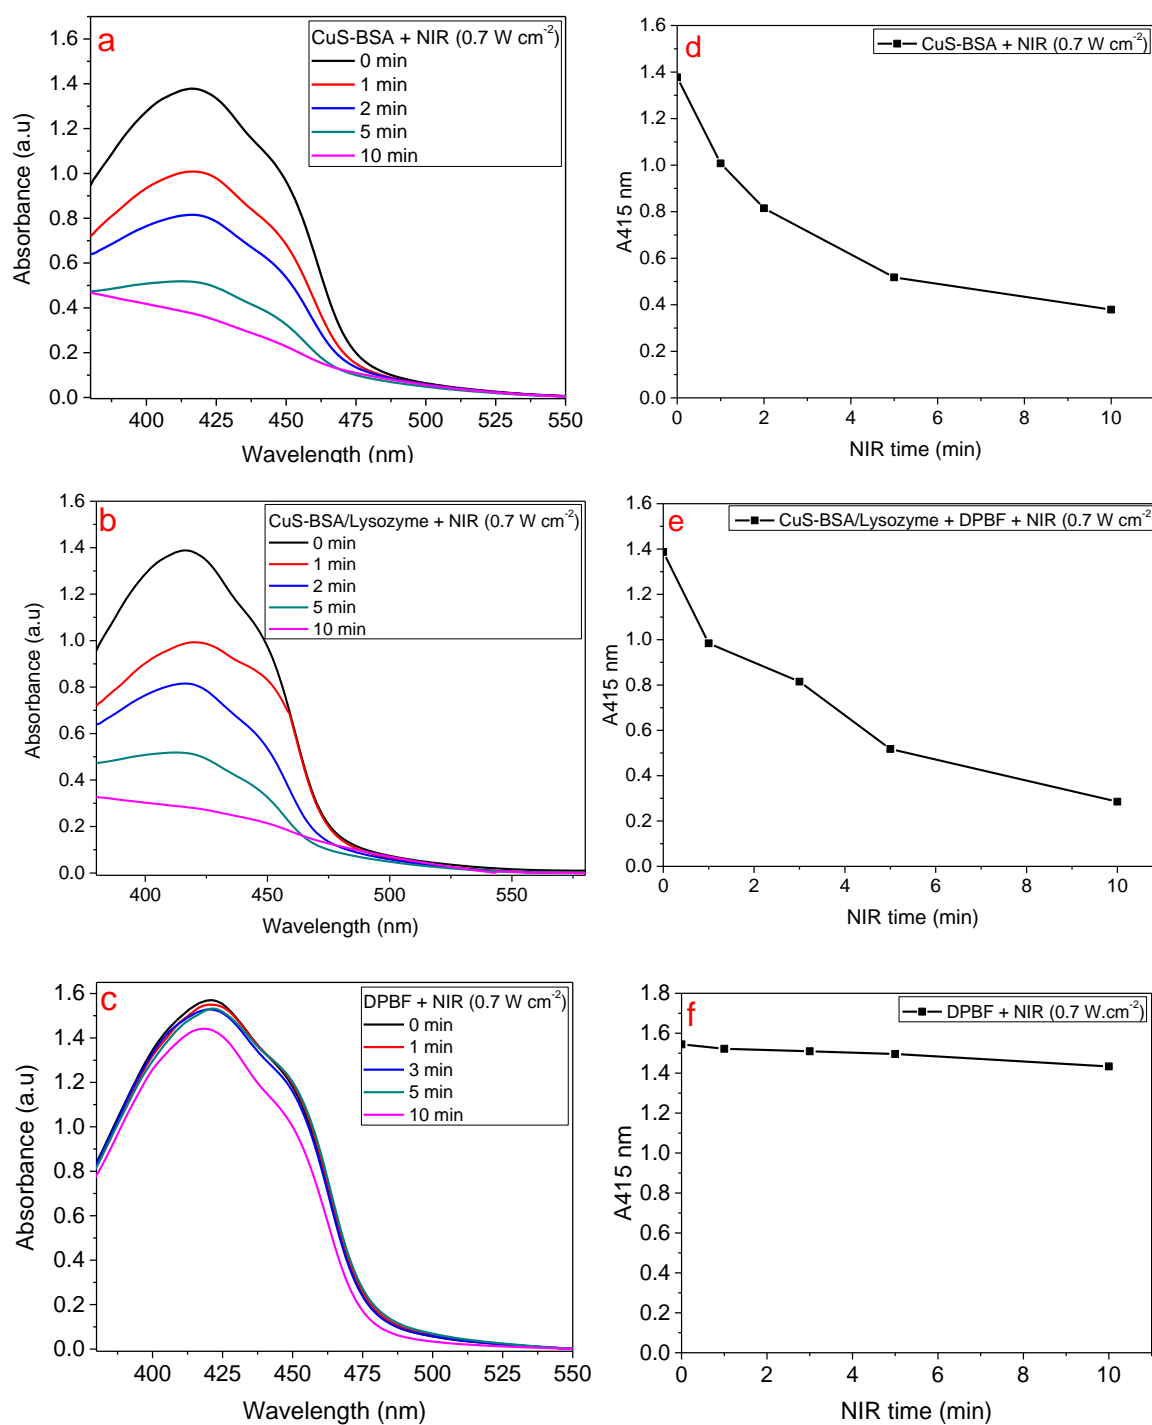

**Figure S15.** Time dependent DPBF quenching experiments: (a) CuS-BSA + DPBF + NIR (0.7 W cm<sup>-2</sup>), (b) CuS-BSA/Lysozyme + DPBF + NIR (0.7 W cm<sup>-2</sup>), (c) DPBF + NIR (0.7 W cm<sup>-2</sup>), (d), (e) and (f) <sup>1</sup>O<sub>2</sub> generation efficiency upon NIR laser irradiation.

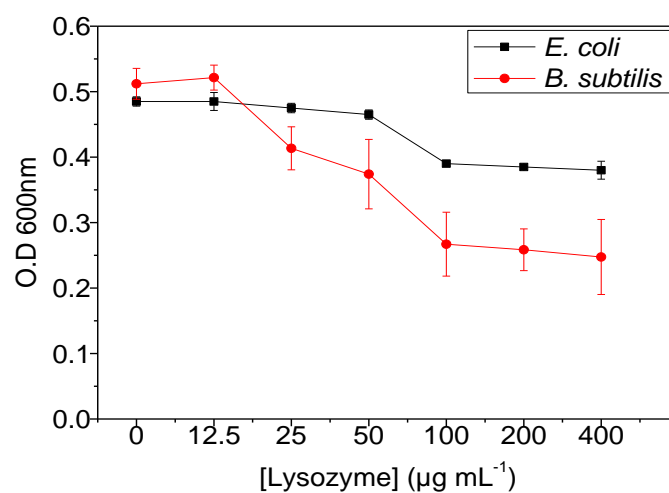

**Figure S16.** Change of OD<sub>600</sub> in the presence of various concentrations of lysozyme (µg mL<sup>-1</sup>) on *E. coli* and *B. subtilis*.

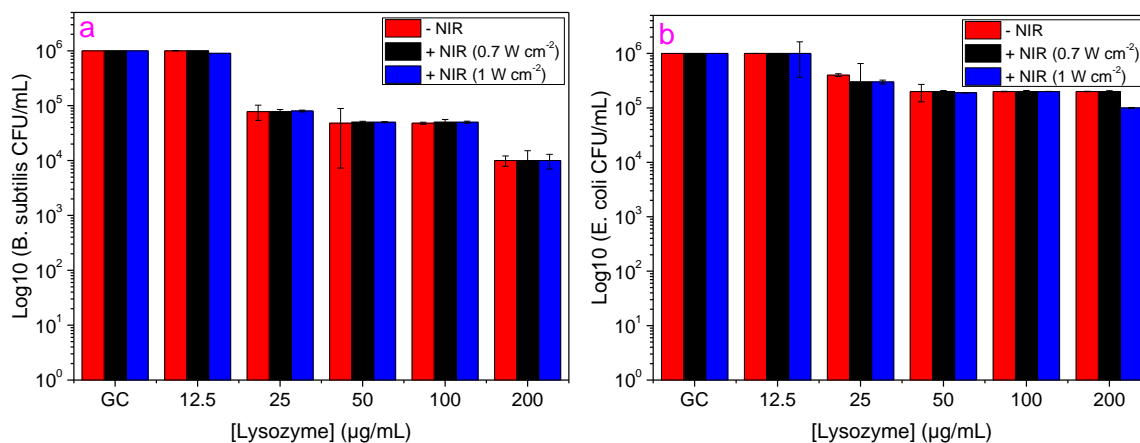

**Figure S17.** Antibacterial activity of lysozyme on *B. subtilis* (a) and *E. coli* (b) using various concentrations of lysozyme without and with NIR irradiation (980 nm) at different laser power densities for 3 min.
